# Supplementary material for: Heme Iron from Meat and Risk of Colorectal Cancer: A Meta-analysis and a Review of the Mechanisms Involved
Source: Oxford University Press journal article supplement (doi:10.1158/1940-6207.capr-10-0113), 2011-01-05
Supplement: 19406207capr100113-sup-56983_2_supp_1_lct9gt.doc [file 19406207capr100113-sup-56983_2_supp_1_lct9gt.doc]

**Supplemental data**

**Heme iron intake and risk of colon cancer: a meta-analysis of prospective cohort studies**

First,we selected prospective studies that assessed the relationship between heme iron intake and CRC. As minimum criteria, studies had to (i) use a prospective study design, and (ii) provide quantification of risks, including confidence intervals. Studies were identified by searching electronic databases (Medline, Google Scholar, The Cochrane Library and Web of Science) for articles published between 1970 and April 2010, using the search terms heme, haem, iron, heme iron, haem iron, colorectal, colon, rectal, cancer, prospective, cohort and exploded variants. References in the retrieved publications were checked for any other pertinent studies.Publications on the relation between red meat intake and colon cancer risk that did not take heme iron into account were excluded. We identified seven publications that reported results of epidemiological studies on heme iron intake related to the risk of colon, rectal or colorectal cancer (1-7). Two publications were excluded because they were not prospective cohort studies (5, 6). The remaining five publications were included in the meta-analysis.

We extracted the following data from each publication: the first author’s last name, the year of publication, the country in which the study was performed, the sample size, the type of population, the age of the participant on entry in the cohort, the number of years of follow-up, the method of assessment of heme iron content in the diet, the categories of heme iron intake, the variable controlled for in the multivariate model, and the relative risk(RR)and 95% CI for colon cancer associated with heme iron intake. We had to limit the meta-analysis to colon cancer because data for colorectal cancer were not reported in two studies (1, 2). From each study, we extracted the adjusted RRof high versus low quintile of heme iron intake. The characteristics of the five prospective cohort studies included in the meta-analysis are listed in Table 1.

For the statistical analysis, we used the reported RR as a measure of association between heme iron intake and the risk of colon cancer. Reported RRs and corresponding confidence intervals (CIs) were transformed into their natural logarithms and weighted by the inverse of variance. For the study that provided separate RRs for proximal and distal colon cancer (1), and for men and women (3), we also presented the pooled RR, weighted by the inverse of variance to obtain a value for colon (distal and proximal) and for both genders respectively (data not shown). Heterogeneity among studies was assessed using Cochran’s Q test (8). The possibility of a publication bias was assessed by funnel analysis. Statistical analyses were performed using StatDirect statistical software (version 2.7.7).

| **Study and country** | **Study participants;**  **age at cohort entry** | **Follow-up years**  **(mean)** | **Number of colon cancer cases** | **Exposure assessment** | **Assessment of heme iron content** | **Adjusted RR[[1]](#footnote-2) 95% Confidence interval[[2]](#footnote-3)**  **for colon cancer** |
| --- | --- | --- | --- | --- | --- | --- |
| *Lee et al, 2004*  Iowa Women’s Health Study, USA | 34 708 post-menopausal women  aged 55-69 years | 1986-2000  (15 years ) | 741  438 proximal  303 distal | Food-frequency questionnaire | A factor of 0.4 was applied to the total iron content of all meat items | Proximal: 2.18 (1.24-3.86)[[3]](#footnote-4) P=0.01  Distal: 0.90 (0.45-1.81)‡  P=0.77 |
| *Larsson et al, 2005*  Swedish Mammography Cohort | 61 433 women  aged 40-75 years | 1987-2004  (14.8 years) | 547 | Food-frequency questionnaire | A factor of 0.4 was applied to the total iron content of all meat items | 1.31 (0.98-1.75)[[4]](#footnote-5)  P=0.03 |
| *Balder et al, 2006*  Netherlands Cohort Study on Diet and Cancer (NLCS) | 120 852  women and men;  Subcohort: 4371 women and men (2156 men 2215 women)  aged 55-69 years | 1986-1995  (9.3 years) | 1023  539 men  484 women | Food-frequency questionnaire | Estimated heme iron content of each meat  mean daily intake of the relevant food items | Men: 1.50 (1.03-2.17)‌‌‌‌[[5]](#footnote-6) [[6]](#footnote-7)  P=0.02  Women: 1.19 (0.80-1.77) **†† P=0.43 |
| *Kabat et al, 2007*  Canadian National Breast screening study (NBSS) | 48 666 women  aged 40-59 years | 1982-1999  (16.4 years) | 428 | Food-frequency questionnaire | The methods of Lee et al. and of Balder et al. were compared and gave similar results. | 0.99 (0.70-1.40)[[7]](#footnote-8)  P=0.99 |
| *Cross et al, 2010*  NIH-AARP Diet and Health Study, USA | 300 948 women and men  aged 50-71 years | 1995-2002  (7.2 years) | 1995 | Food-frequency questionnaire  Risk-factor questionnaire | Heme iron database based on measured values from meats cooked using different methods and cooked to varying degrees of doneness, used in conjunction with the detailed meat cooking questionnaire to quantitatively assess heme iron intake | 1.10 (0.94-1.28)[[8]](#footnote-9)  P= 0.138 |

**Meta-analysis and quantitative review of experimental studies**

To assess the effect of heme iron on the incidence of preneoplastic lesions in carcinogen-induced rats, we evaluated a global standardized effect size from (9-12) with the endpoint “number of aberrant crypts per colon”. We excluded groups fed a diet with additives (polyphenols, calcium) in order to study only the effect of heme. We excluded the hemin-fed groups because the results were not comparable with the other groups (hemoglobin and red meat). Although hemin is a good model for processed meat, it does not appear to mimic red meat properly (9, 11). We also excluded groups fed diets with chicken or black pudding, because there is almost no heme in chicken breast, and the heme concentration in blood pudding appeared to be too high to compare with other groups (10). We used standardized effect size, with continuous criteria, which enables small differences among the studies (e.g., choice of carcinogen) to be taken into account. Statistical analyses were performed using Revman 5, the Cochrane IMS statistical software. There was no heterogeneity among groups (p-value = 0.6), so a standard fixed effect was used. The findings of the present analysis revealed a consistent association between intake of hemoglobin and beef and an increase in the number of aberrant crypts per colon, with a global standardized effect size of 1.73 [1.33-2.14] (Fig. 1).

We then performed a logistic regression using R (http://www.r-project.org/), version 2.10.1. This analysis revealed a significant association between the number of aberrant crypts per colon and the concentration of heme in the diet (p-value=0.02). The R-squared was 0.62, which means that 62% of aberrant crypt foci variability was explained by the concentration of heme in the diet.


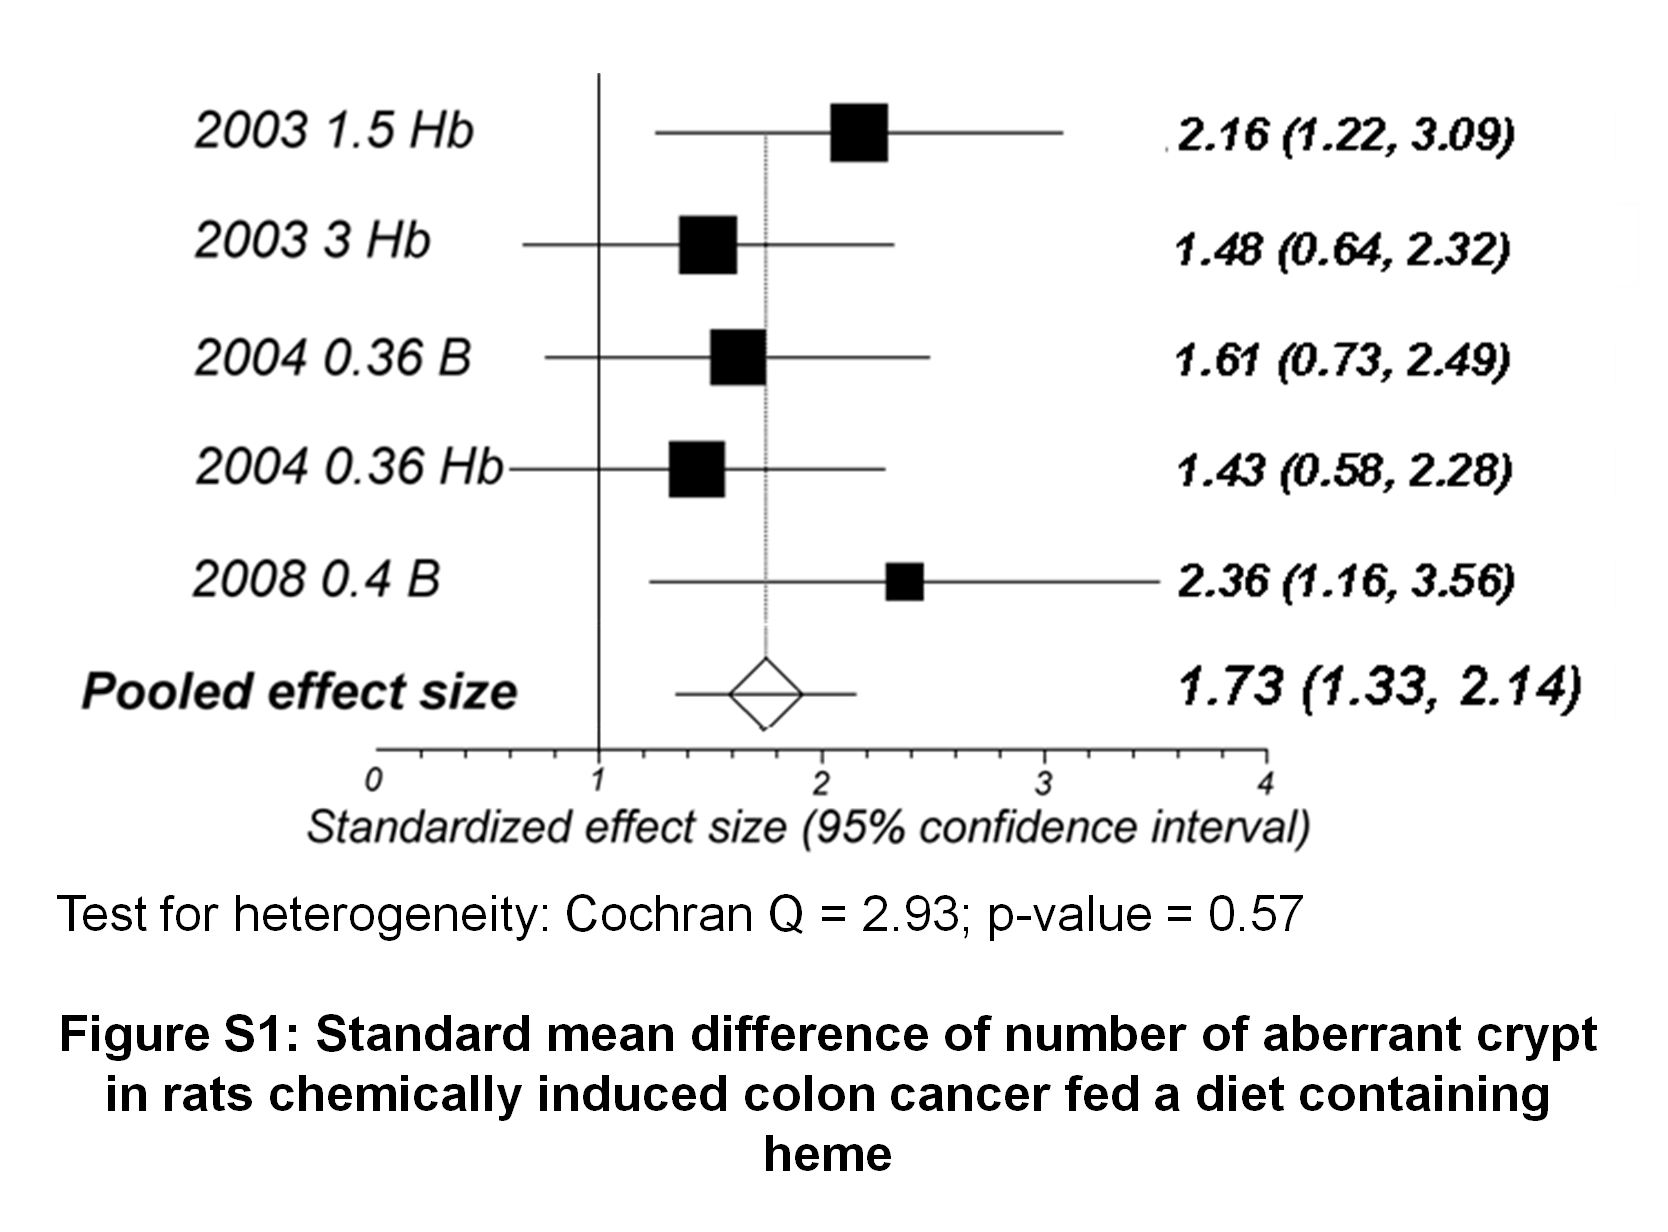


**Figure 1:** Studies (left column of the graph) are ordered by year of publication (Pierre *et al*, 2003; Pierre *et al*, 2004, and Pierre *et al*, 2008) and increasing dietary heme concentration (1.5, 3, 0.36 and 0.4 mol/g). Hb: diet contained haemoglobin, and B: diet contained beef. Squares represent group-specific standardized effect size, which is a measure of the strength of the relationship between two variables, commonly used in analysis of experimental data, in order to combine them in a summary effect size (pooled effect size). The size of the squares is proportional to the statistical weight that each study contributed to the pooled effect size. Horizontal lines represent 95% confidence intervals (CIs). The diamond represents the pooled effect size of all studies included in the analysis, and its 95% CI.

**References**

**1**. Lee DH, Anderson KE, Harnack LJ, Folsom AR, Jacobs DR, Jr. Heme iron, zinc, alcohol consumption, and colon cancer: Iowa Women's Health Study. J Natl Cancer Inst 2004;96:403-7.

**2**. Larsson SC, Adami HO, Giovannucci E, Wolk A. Re: Heme iron, zinc, alcohol consumption, and risk of colon cancer. J Natl Cancer Inst 2005;97:232-3; author reply 3-4.

**3**. Balder HF, Vogel J, Jansen MC*, et al.* Heme and chlorophyll intake and risk of colorectal cancer in the Netherlands cohort study. Cancer Epidemiol Biomarkers Prev 2006;15:717-25.

**4**. Kabat GC, Miller AB, Jain M, Rohan TE. A cohort study of dietary iron and heme iron intake and risk of colorectal cancer in women. Br J Cancer 2007;97:118-22.

**5**. Grant WB. An ecological study of cancer mortality rates including indices for dietary iron and zinc. Anticancer Res 2008;28:1955-63.

**6**. Ferrucci LM, Cross AJ, Graubard BI*, et al.* Intake of meat, meat mutagens, and iron and the risk of breast cancer in the Prostate, Lung, Colorectal, and Ovarian Cancer Screening Trial. Br J Cancer 2009;1001:178-84.

**7**. Cross AJ, Ferrucci LM, Risch A*, et al.* A large prospective study of meat consumption and colorectal cancer risk: an investigation of potential mechanisms underlying this association. Cancer Res 2010;70:2406-14.

**8**. Higgins JP, Thompson SG. Quantifying heterogeneity in a meta-analysis. Stat Med 2002;21:1539-58.

**9**. Pierre F, Tache S, Petit CR, Van der Meer R, Corpet DE. Meat and cancer: haemoglobin and haemin in a low-calcium diet promote colorectal carcinogenesis at the aberrant crypt stage in rats. Carcinogenesis 2003;24:1683-90.

**10**. Pierre F, Freeman A, Tache S, Van der Meer R, Corpet DE. Beef meat and blood sausage promote the formation of azoxymethane-induced mucin-depleted foci and aberrant crypt foci in rat colons. J Nutr 2004;134:2711-6.

**11**. Pierre F, Santarelli R, Tache S, Gueraud F, Corpet DE. Beef meat promotion of dimethylhydrazine-induced colorectal carcinogenesis biomarkers is suppressed by dietary calcium. Br J Nutr 2008;99:1000-6.

**12**. Belobrajdic DP, Mcintosh GH, Owens JA. Whey proteins protect more than red meat against azoxymethane induced ACF in wistar rats. Cancer Letters 2003;198:43-51.

1. Relative risk (RR) was calculated using Cox proportional hazards models [↑](#footnote-ref-2)
2. High versus low quintile of heme iron consumption [↑](#footnote-ref-3)
3. Adjustments : Age; total caloric intake; body mass index; physical activity; smoking status, alcohol consumption; history of diabetes; hormone replacement therapy; intake of multivitamins, saturated fat, soluble fibers, insoluble fibers, calcium, vitamin E, folates from food and multivitamin supplements [↑](#footnote-ref-4)
4. Adjustments: Age; body mass index; educational level; total energy; intake of saturated fat, dietary fibers, calcium, folates [↑](#footnote-ref-5)
5. Cases diagnosed during the first 2 years of follow-up were excluded [↑](#footnote-ref-6)
6. Adjustments: Age at baseline; body mass index; family history of colorectal cancer; smoking status; physical activity; total energy intake; alcohol consumption; total consumption of vegetables [↑](#footnote-ref-7)
7. Age; body mass index; menopausal status; use of oral contraceptives; hormone replacement therapy; dietary intake of fat, fiber, folic acid, total calories; pack-years of smoking; alcohol intake; education; physical activity [↑](#footnote-ref-8)
8. Gender; educational level; body mass index; smoking; total energy intake (kcals/day); fiber (g/1000kcal); dietary calcium (mg/1000kcal) [↑](#footnote-ref-9)
